# Supplementary material
Source: PubMed Central journal article supplement (PMC1416492)
Supplement: NIHMS4382-supplement-Fig_S1.pdf [file NIHMS4382-supplement-Fig_S1.pdf]

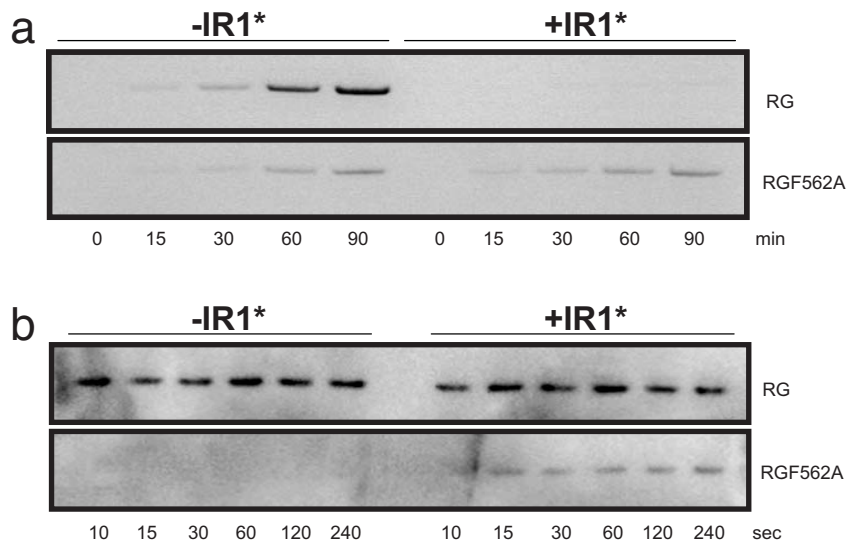

Supplemental Figure 1. Conjugation of RanGAP1 and RanGAP1(F562A). A) Time course for conjugation under multiple turnover conditions with and without IR1\* for RanGAP1 (RG; top panel) and RanGAP1(F562A) (RGF562A; bottom panel). B) Time course for conjugation under single turnover conditions with and without IR1\* for RanGAP1 (RG; top panel) and RanGAP1(F562A) (RGF562A; bottom panel). RanGAP1 containing the alanine substitution at Phe562 was generated by PCR using the QuickChange Site-Directed Mutagenesis Kit (Stratagene). The RanGAP1(F562A) was purified as described for RanGAP1 in Methods. Single and multiple turnover reactions were conducted as described in Methods.
