# Supplementary material
Source: PubMed Central journal article supplement (PMC1416492)
Supplement: NIHMS4382-supplement-Fig_S2.pdf [file NIHMS4382-supplement-Fig_S2.pdf]

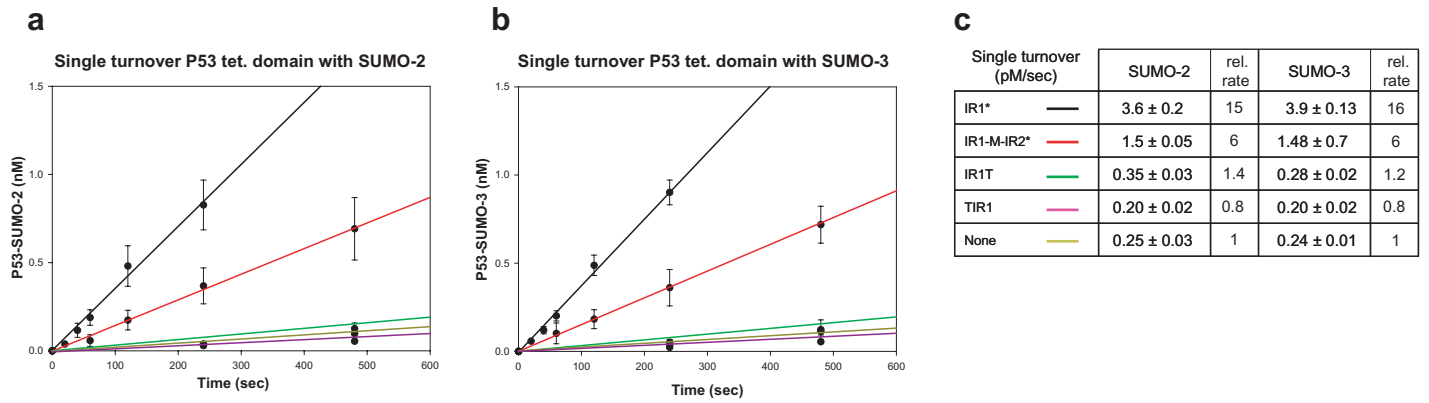

Supplemental Figure 2. Biochemical activities of Nup358/RanBP2 with SUMO-2 and SUMO-3. Error bars indicate  $\pm 1$  standard deviation. A) Graphical analysis for SUMO-2 conjugation rates under single turnover conditions for the p53 tetramerization domain using Nup358/RanBP2 IR1\* (black), IR1-M-IR2\* (red), IR1T (green), TIR1 (purple), none (gold). B) Graphical analysis for SUMO-3 conjugation rates under single turnover conditions for the p53 tetramerization domain using Nup358/RanBP2 IR1\* (black), IR1-M-IR2\* (red), IR1T (green), TIR1 (purple), none (gold). C) Table of rate constants (pM/sec) and relative rates obtained for the reactions depicted in A and B.
