# Supplementary material
Source: PubMed Central journal article supplement (PMC1416492)
Supplement: NIHMS4382-supplement-Fig_S3.pdf [file NIHMS4382-supplement-Fig_S3.pdf]

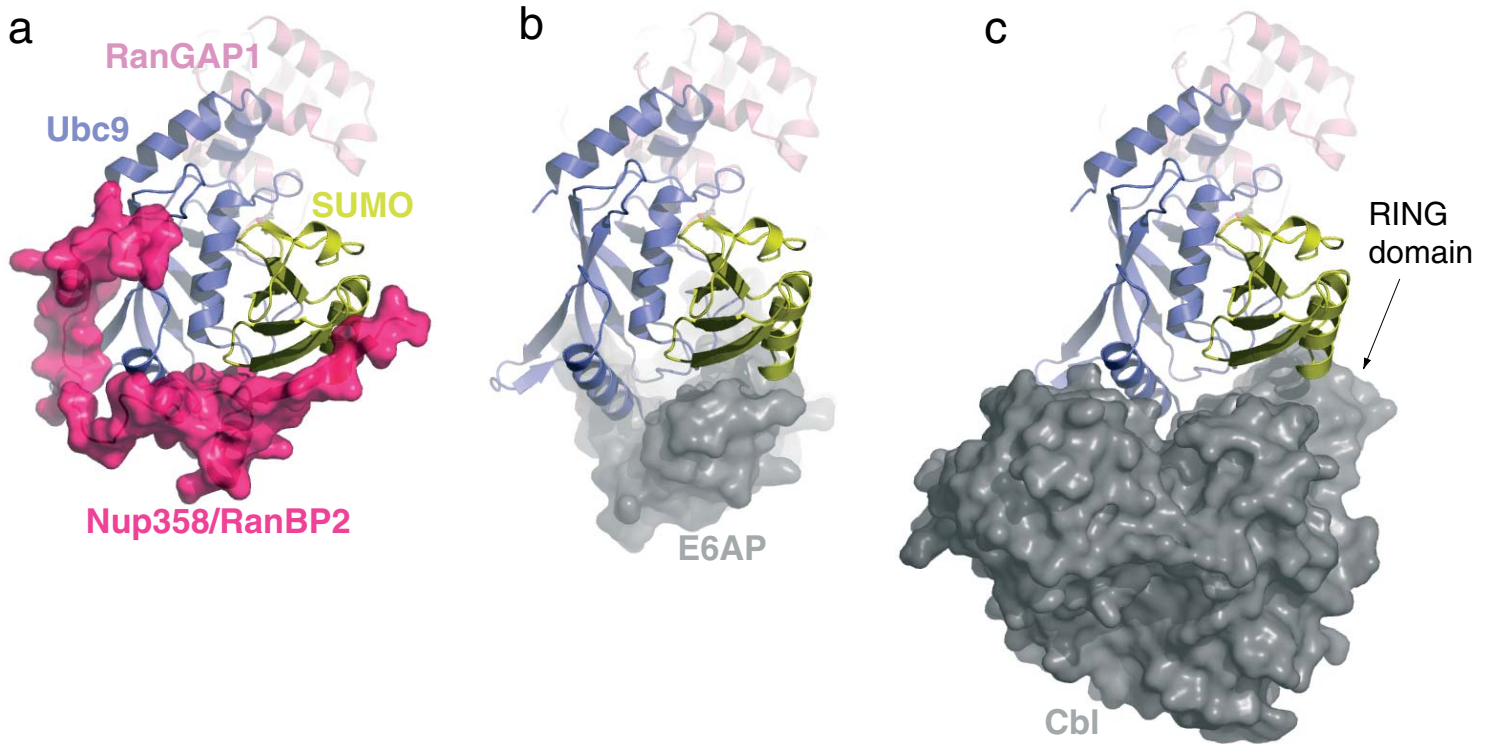

Supplemental Figure 3. Comparison of potential surfaces utilized in E2-E3 interactions. A) The SUMO-RanGAP1-Ubc9-Nup358/RanBP2 complex with Ubc9, SUMO, and RanGAP1 in ribbon representation and Nup358/RanBP2 in surface and ribbon representation. B) Complex between SUMO-RanGAP1-Ubc9 and E6AP generated by aligning Ubc9 to Ubch7. E6AP shown in grey surface representation with Ubch7 omitted for clarity to show the potential E6AP surfaces that could interact with the ubiquitin. C) Similar alignment to c-Cbl-Ubch7 with Ubch7 omitted for clarity and c-Cbl shown in grey surface representation highlighting potential surfaces (RING domain labeled) that could interact with ubiquitin.
