# Supplementary material
Source: PubMed Central journal article supplement (PMC1416492)
Supplement: NIHMS4382-supplement-SI_Table_1.pdf [file NIHMS4382-supplement-SI_Table_1.pdf]

Supplemental Table I. Crystallographic Data and Refinement Statistics

|                                                 |                                 |
|-------------------------------------------------|---------------------------------|
| PDB ID                                          | Native<br>1Z5S                  |
| Source                                          | APS 31ID                        |
| Wavelength (Å)                                  | 0.9793                          |
| Resolution Limits (Å)                           | 50-3.0                          |
| Space Group                                     | P3 <sub>2</sub> 21              |
| Unit Cell (Å) a, b, c, α, β, γ                  | 157.1, 157.1, 59.6, 90, 90, 120 |
| Number of observations                          | 147869                          |
| Number of reflections                           | 16464                           |
| Completeness (%)                                | 97.0 (91.8)                     |
| Mean I/σI                                       | 15.1 (2.1)                      |
| R-merge on I <sup>a</sup>                       | 7.5 (46.4)                      |
| Cut-off criteria I/σI                           | 0                               |
| <u>Refinement Statistics</u>                    |                                 |
| Resolution Limits (Å)                           | 30-3.0                          |
| Number of reflections                           | 16461                           |
| Completeness (%)                                | 96.5 (86.2)                     |
| Cutoff Criteria I/σI                            | 0                               |
| Protein/water atoms                             | 3564/28                         |
| Rcryst <sup>b</sup>                             | 0.247 (0.425)                   |
| Rfree (5% of data)                              | 0.290 (0.432)                   |
| Bonds (Å) <sup>c</sup>                          | 0.006                           |
| Angles (°) <sup>c</sup>                         | 1.2                             |
| Bfactor (mc/sc in Å <sup>2</sup> ) <sup>c</sup> | 2.27/2.80                       |

a.  $R_{merge} = \frac{\sum hkl \sum i |I(hkl)_i - \langle I(hkl) \rangle|}{\sum hkl \sum i \langle I(hkl)_i \rangle}$ .

b.  $R_{cryst} = \frac{\sum hkl |F_o(hkl) - F_c(hkl)|}{\sum hkl |F_o(hkl)|}$ , where  $F_o$  and  $F_c$  are observed and calculated structure factors, respectively.

c. Values indicate root-mean-square deviations in bond lengths, bond angles, and Bfactors of bonded atoms.

Parentheses indicate statistics for the high-resolution data bin for x-ray and refinement data.

Data were processed using DENZO, SCALEPACK<sup>1</sup>, and CCP4<sup>2</sup>. The structure was solved by molecular replacement using CCP4<sup>2</sup>. The atomic model was built using O<sup>3</sup> and refined using CNS<sup>4</sup>.

1. Otwinowski, Z. & Minor, W. Processing of X-ray Diffraction Data Collected in Oscillation Mode. *Methods in Enzymology* **276**, 307-326 (1997).

2. Collaborative Computational Project. The CCP4 suite: programs for protein crystallography. *Acta Crystallography* **D50**, 760-763 (1994).

3. Jones, T. A., Zou, J. Y., Cowan, S. W. & Kjeldgaard, M. Improved methods for building protein models in electron density maps and the location of errors in these models. *Acta Crystallogr. A* **47 (Pt 2)**, 110-119 (1991).

4. Brunger, A. T. *et al.* Crystallography & NMR system: A new software suite for macromolecular structure determination. *Acta Crystallogr. D. Biol. Crystallogr.* **54 (Pt 5)**, 905-921 (1998).
